# Supplementary material
Source: MDPI journal article supplement (https://www.mdpi.com/1999-4907/8/10/369)
Supplement: s1 [file s1]

Supplementary Materials

**Supplementary Material 1:** Information on vegetation study sites: name of plots (lower case letter, a and b, indicate replicate plots), forest name, land manager, plot latitude and longitude, and distance (m) from a biocontrol release site. Note: Because *T. planipennisi*, the dominant EAB-biocontrol agent established in this region, was not released at or near plot SL-SLW, these plots were considered non-release control plots for the final analysis. Plots defined as a parasitoid-release plot are bold. Number assigned to each plot is indicated inside the squared brakects.

| **Plot Name** | **Forest Name** | **Land Manager** | **Latitude** | **Longitude** | **Distance** |
| --- | --- | --- | --- | --- | --- |
| BRIa [1] | Brighton State Recreation Area | Michigan Department of Natural Resources | 42.501287 | −83.832168 | 10821 |
| BRIb [2] | Brighton State Recreation Area | Michigan Department of Natural Resources | 42.501145 | −83.834423 | 11006 |
| CALa [3] | Calla Burr Memorial Plant Preserve | Michigan Nature Association | 42.772765 | −83.577278 | 8082 |
| CALb [4] | Calla Burr Memorial Plant Preserve | Michigan Nature Association | 42.772793 | −83.578355 | 8008 |
| CRPK [5] | Ralph W. Crego Park | Lansing Parks and Recreation | 42.716870 | −84.514143 | 564 |
| DHMPKa[6] | Dexter Huron Metropark | Huron-Clinton Metroparks | 42.330148 | −83.859518 | 46 |
| DHMPKb[7] | Dexter Huron Metropark | Huron-Clinton Metroparks | 42.329730 | −83.859760 | 69 |
| GEOa [8] | George Reserve | University of Michigan | 42.448313 | −84.016475 | 5429 |
| GEOb [9] | George Reserve | University of Michigan | 42.449970 | −84.007905 | 5058 |
| GREa [10] | Waterloo State Recreation Area | Michigan Department of Natural Resources | 42.377523 | −84.105953 | 11865 |
| GREb [11] | Waterloo State Recreation Area | Michigan Department of Natural Resources | 42.376417 | −84.106348 | 11787 |
| HURa [12] | Huron Meadows | Huron-Clinton Metroparks | 42.473927 | −83.781120 | 7403 |
| HURb [13] | Huron Meadows | Huron-Clinton Metroparks | 42.474168 | −83.780630 | 7355 |
| KSa [14] | Kensington Metropark | Huron-Clinton Metroparks | 42.532887 | −83.671127 | 444 |
| KSb [15] | Kensington Metropark | Huron-Clinton Metroparks | 42.532480 | −83.671987 | 403 |
| LPRFLTa [16] | Harris Nature Center | Meridian Township Parks and Recreation | 42.699945 | −84.375873 | 13 |
| LPRFLTb [17] | Harris Nature Center | Meridian Township Parks and Recreation | 42.698285 | −84.373737 | 222 |
| PNKSLa [18] | Pinckney State Recreation Area | Michigan Department of Natural Resources | 42.421137 | −83.976012 | 936 |
| PNKSLb [19] | Pinckney State Recreation Area | Michigan Department of Natural Resources | 42.421230 | −83.973828 | 809 |
| RADa [20] | Radrick Natural Area | University of Michigan | 42.288885 | −83.659352 | 17086 |
| RADb [21] | Radrick Natural Area | University of Michigan | 42.289145 | −83.659073 | 17101 |
| REDa [22] | Red Cedar River | Private Property | 42.685967 | −84.130560 | 20140 |
| REDb [23] | Red Cedar River | Private Property | 42.686712 | −84.132885 | 19944 |
| RIZa [24] | Rizor Memorial Nature Sanctuary | Michigan Nature Association | 42.698717 | −83.780013 | 16357 |
| RIZb [25] | Rizor Memorial Nature Sanctuary | Michigan Nature Association | 42.700138 | −83.780542 | 16253 |
| RODa [26] | Joan Rodman Memorial Plant Preserve | Michigan Nature Association | 42.173980 | −83.818548 | 17654 |
| RODb [27] | Joan Rodman Memorial Plant Preserve | Michigan Nature Association | 42.174818 | −83.818992 | 17555 |
| SCAa [28] | Scarlett Mitchell Nature Area | Ann Arbor Parks and Recreation | 42.232692 | −83.692945 | 17452 |
| SCAb [29] | Scarlett Mitchell Nature Area | Ann Arbor Parks and Recreation | 42.232205 | −83.691803 | 17560 |
| SCIa [30] | Scio Woods Preserve | Washtenaw County Parks and Recreation | 42.257720 | −83.810115 | 8987 |
| SCIb [31] | Scio Woods Preserve | Washtenaw County Parks and Recreation | 42.257133 | −83.809045 | 9085 |
| SL-SLWa [32] | Seven Lakes State Park | Michigan Department of Natural Resources | 42.817112 | −83.662805 | 281 |
| SL-SLWb [33] | Seven Lakes State Park | Michigan Department of Natural Resources | 42.818143 | −83.662807 | 205 |
| STIa [34] | Stinchfield Woods | University of Michigan | 42.399235 | −83.925522 | 1884 |
| STIb [35] | Stinchfield Woods | University of Michigan | 42.400750 | −83.925562 | 2025 |
| WATa [36] | Waterloo State Recreation Area | Michigan Department of Natural Resources | 42.310217 | −84.180520 | 5482 |
| WATb [37] | Waterloo State Recreation Area | Michigan Department of Natural Resources | 42.309372 | −84.180700 | 5517 |
| WILa [38] | Williamston Floodplain Plant Preserve | Michigan Nature Association | 42.690963 | −84.266045 | 9027 |
| WILb [39] | Williamston Floodplain Plant Preserve | Michigan Nature Association | 42.691817 | −84.266113 | 9012 |
| WLPLKa [40] | Waterloo State Recreation Area | Michigan Department of Natural Resources | 42.335235 | −84.239290 | 110 |
| WLPLKb [41] | Waterloo State Recreation Area | Michigan Department of Natural Resources | 42.335987 | −84.240015 | 199 |

**Supplementary Material 2:** Parasitoid-release numbers for the biocontrol release plots. The release data for each parasitoid species is sorted by date and includes the number of adults released, as well as total numbers and percentages released by species.

| **Site Name** | **Date** | ***O. agrili*** | ***S. agrili*** | ***T. planipennisi*** |
| --- | --- | --- | --- | --- |
| CRPK | 14-Aug-08 | 118 | 0 | 0 |
| CRPK | 23-Sep-09 | 0 | 0 | 300 |
| CRPK | 10-Jun-12 | 155 | 0 | 0 |
| DHMPK | 3-Jun-11 | 0 | 0 | 450 |
| DHMPK | 10-Jun-11 | 0 | 0 | 900 |
| DHMPK | 23-Jun-11 | 0 | 0 | 1083 |
| DHMPK | 28-Jun-11 | 260 | 50 | 50 |
| DHMPK | 11-Jul-11 | 140 | 100 | 51 |
| KS | 4-Sep-09 | 0 | 0 | 150 |
| KS | 9-Sep-09 | 0 | 0 | 225 |
| KS | 23-Jul-10 | 260 | 287 | 1072 |
| LPRFLT | 23-Jul-08 | 100 | 0 | 0 |
| LPRFLT | 10-Aug-08 | 100 | 0 | 0 |
| LPRFLT | 14-Aug-08 | 0 | 56 | 0 |
| LPRFLT | 12-Sep-08 | 0 | 0 | 80 |
| LPRFLT | 20-Sep-08 | 0 | 0 | 28 |
| LPRFLT | 27-Sep-08 | 0 | 0 | 35 |
| LPRFLT | 30-Sep-08 | 0 | 0 | 20 |
| LPRFLT | 4-Oct-08 | 0 | 0 | 40 |
| LPRFLT | 28-May-09 | 0 | 0 | 80 |
| LPRFLT | 2-Jun-09 | 0 | 0 | 420 |
| LPRFLT | 12-Jun-09 | 0 | 0 | 200 |
| LPRFLT | 15-Jun-09 | 0 | 0 | 200 |
| LPRFLT | 24-Jun-09 | 300 | 0 | 0 |
| LPRFLT | 3-Jul-09 | 0 | 0 | 600 |
| LPRFLT | 10-Jul-09 | 0 | 0 | 500 |
| LPRFLT | 17-Jul-09 | 0 | 0 | 700 |
| LPRFLT | 21-Jul-09 | 0 | 200 | 0 |
| LPRFLT | 4-Aug-09 | 0 | 0 | 200 |
| LPRFLT | 7-Aug-09 | 0 | 0 | 151 |
| LPRFLT | 21-Aug-09 | 0 | 200 | 0 |
| LPRFLT | 10-Sep-09 | 0 | 0 | 200 |
| PNKSL | 8-Jul-11 | 67 | 100 | 113 |
| PNKSL | 16-Jul-11 | 200 | 0 | 600 |
| PNKSL | 16-Aug-11 | 30 | 290 | 0 |
| SL | 22-Aug-07 | 0 | 93 | 0 |
| SL | 28-Aug-07 | 0 | 33 | 0 |
| SL | 14-Sep-07 | 0 | 45 | 0 |
| SL | 21-Jun-12 | 321 | 0 | 0 |
| SLW | 21-Jun-12 | 320 | 0 | 0 |
| WLPLK | 16-Jun-11 | 0 | 0 | 353 |
| WLPLK | 8-Jul-11 | 53 | 95 | 121 |
| WLPLK | 16-Jul-11 | 200 | 0 | 600 |
| WLPLK | 16-Aug-11 | 70 | 300 | 0 |
| Parasitoids released | | 2694 | 1849 | 9522 |
| Percent of total release | | 19% | 13% | 68% |

**Supplementary Material 3:** Vegetation information at each study plot, list of adults tree species (in parenthesis basal area of each species [m2/ha]); ash basal area includes both trees alive and recognizable dead ash trees) density of native seedlings, basal area of only live trees, density of ash saplings, invasive and weedy groudcover, and density of invasive and weedy saplings. All density measurements are in number of stems/m² , Basal Area m²/ha, Groundcover %, and include means and standard deviation (±SD).

| **Plot name** | **Native Seedlings** | **Basal Area** | **Ash Saplings** | **Invasive & Weedy Groundcover** | **Invasive & Weedy Saplings** |
| --- | --- | --- | --- | --- | --- |
| BRIa  *Acer rubrum* (4.22)  *Pinus strobus* (0.27)  *Populus grandidentata* (21.8)  *Prunus serotina* (1.86)  *Quercus rubra* (2.53)  *Q.velutina* (2.48) | 8.87 ± 0.09 | 33.2 | 0.6875 ± 0.0119 | 2.25 ± 0.10 | 0.1125 ± 0.0137 |
| BRIb  *A.rubrum* (1.44)  *A.saccharum* (20.13)  *J.virginiana* (0.92)  *P. strobus* (5.04)  *P.serotina* (0.87)  *Robinia pseudoacacia* (15.13) | 1.57 ± 0.03 | 43.8 | 0.5250 ± 0.0089 | 12.98 ± 0.17 | 0.1375±0.0098 |
| CALa  *A.rubrum* (2.3)  *Carya glabra* (4.35)  *Fraxinus americana* (2.61)  *P.deltoides* (0.42)  *P.serotina* (1.67)  *Q.alba* (9.84)  *Q.rubra* (15.19)  *Q.velutina* (4.69) | 6.22 ± 0.04 | 38.49 | 0.1000 ± 0.0047 | 9.05 ± 0.14 | 0.0000 ± 0.0001 |
| CALb  *C.glabra* (0.93)  *P.serotina* (2.69)  *Q.alba* (14.81)  *U. americana* (0.66) | 5.40 ± 0.03 | 19.1 | 0.3250 ± 0.0035 | 0.03 ± 0.01 | 0.0000 ± 0.0001 |
| CRPK  *A.negundo* (0.86)  *F.americana* (9.12)  *P.serotina* (11.19)  *Rhamnus cathartica* (0.28) | 4.17 ± 0.57 | 12.7 | 0.0625 ± 0.0001 | 40.05 ± 0.30 | 1.2125 ± 0.0157 |
| DHMPKa  *A.saccharum* (1.42)  *C.cordiformis* (5.2)  *F.americana* (4.9)  *Ostrya virginiana* (2.24)  *P.serotina* (8.78)  *Q.bicolor* (2.55)  *Tilia americana* (0.38)  *U. americana* (4.27) | 9.22 ± 0.23 | 24.8 | 3.2250 ± 0.0246 | 2.73 ± 0.05 | 0.0250 ± 0.0001 |
| DHMPKb  *A.nigrum* (17.25)  *A.saccharinum* (13.13)  *O.virginiana* (0.21)  *Q.macrocarpa* (9.92)  *T.americana* (0.2) | 1.17 ± 0.20 | 40.7 | 1.3375 ± 0.0143 | 5.73 ± 0.30 | 0.0125 ± 0.0001 |
| GEOa  *C.cordiformis* (5.69)  *C.glabra* (0.45)  *P.serotina* (6.03)  *U.americana* (0.19) | 18.0 ± 0.20 | 12.6 | 0.1125 ± 0.0001 | 10.93 ± 0.23 | 0.2500 ± 0.0236 |
| GEOb  *A.rubrum* (3.66)  *C.glabra* (1.22)  *P.serotina* (2.73)  *Q.alba* (1.47)  *Q.velutina* (27.84) | 37.55 ± 0.12 | 36.9 | 0.0375 ± 0.0001 | 14.58 ± 0.17 | 0.1500 ± 0.0053 |
| GREa  *F.americana* (4.53)  *J.virginiana* (0.21)  *P.serotina* (12.29)  *Q.rubra* (2.89)  *Q.velutina* (1.87)  *Sassafras albidum* (1.54)  *U.americana* (4.34) | 1.40 ± 0.10 | 23.4 | 0.3875 ± 0.0111 | 16.78 ± 0.16 | 0.4750 ± 0.0157 |
| GREb  *A.rubrum* (1.79)  *P.serotina* (0.31)  *Q.velutina* (25.37)  *U.americana* (2.77) | 0.70 ± 0.15 | 30.2 | 0.1000 ± 0.0001 | 34.60 ± 0.31 | 1.8375 ± 0.0229 |
| HURa  *A.negundo* (0.47)  *P.serotina* (2.03)  *Q.rubra* (8.33)  *R.pseudoacacia* (6.97) | 11.92 ± 0.11 | 17.8 | 0.0500 ± 0.0001 | 74.28 ± 0.30 | 1.4875 ± 0.0173 |
| HURb  *A.saccharum* (1.32)  *Q.rubra* (1.17)  *R.pseudoacacia* (30.74)  *T.americana* (3.44) | 18.90 ± 0.07 | 36.7 | 0.0500 ± 0.0001 | 79.90 ± 0.39 | 1.9125 ± 0.0187 |
| KSa  *F.americana* (1.27)  *J.virginiana* (5.47)  *P.serotina* (3.25)  *U.americana* (1.22) | 4.70 ± 0.08 | 9.9 | 0.0750 ± 0.0001 | 80.33 ± 0.29 | 1.0500 ± 0.0127 |
| KSb  *P.grandidentata* (2.8)  *P.serotina* (4.76)  *Q.rubra* (0.21)  *R.pseudoacacia* (4.96)  *U.americana* (2.71) | 10.15 ± 0.07 | 15.4 | 0.1375 ± 0.0040 | 34.13 ± 0.22 | 0.5500 ± 0.0250 |
| LPRFLTa  *A.saccharum* (0.32)  *J.virginiana* (9.78)  *Picea abies* (6.76)  *Q.rubra* (9.82)  *Q.velutina* (6.15)  *U.americana* (8.39) | 0.000± 0.0001 | 41.2 | 0.5750 ± 0.0097 | 25.30 ± 0.21 | 0.2625 ± 0.0118 |
| LPRFLTb  *A.saccharinum* (2.06)  *F.americana* (1.53)  *J.virginiana* (0.63)  *P.resinosa* (1.14)  *P.grandidentata* (32.6)  *U.americana* (0.42) | 5.80± 0.08 | 38.4 | 0.7625 ± 0.0118 | 8.83 ± 0.20 | 0.2375 ± 0.0135 |
| PNKSLa  *A.rubrum* (4.11)  *F.americana* (11.9)  *P.serotina* (5.18)  *U.americana* (2.37) | 10.85 ± 0.06 | 11.6 | 0.0000 ± 0.0001 | 17.83 ± 0.21 | 0.6750 ± 0.0283 |
| PNKSLb  *C.glabra* (1.24)  *P.serotina* (1)  *Q.velutina* (15.61)  *U.americana* (0.35) | 2.45± 0.07 | 18.2 | 0.3375 ± 0.0042 | 17.88 ± 0.40 | 0.1125 ± 0.0094 |
| RADa  *A.rubrum* (1.26)  *A.saccharum* (10.8)  *Q.alba* (3.61)  *U.americana* (0.52) | 5.20 ± 0.05 | 16.2 | 0.0250 ± 0.0001 | 4.50 ± 0.22 | 0.0000 ± 0.0001 |
| RADb  *A.nigrum* (0.2)  *A.rubrum* (1.55)  *A.saccharum* (0.69)  *P.serotina* (0.19)  *Q.alba* (3.59)  *Q.velutina* (29.13)  *S.albidum* (10.77)  *T.americana* (3.31) | 3.75 ± 0.07 | 49.4 | 0.0625 ± 0.0001 | 10.08 ± 0.24 | 0.0875 ± 0.0191 |
| REDa  *A.rubrum* (0.25)  *A.saccharum* (16.95)  *P.deltoides* (4.29)  *P.serotina* (13.22)  *Q.bicolor* (0.19)  *U.americana* (0.38) | 5.70 ± 0.05 | 35.3 | 0.9875 ± 0.0161 | 12.60 ± 0.14 | 0.0375 ± 0.0088 |
| REDb  *A.saccharum* (31.4)  *F.americana* (0.25)  *P.deltoides* (22.58)  *P.serotina* (0.21)  *U.americana* (0.76) | 3.15 ± 0.04 | 55.3 | 0.2000 ± 0.0032 | 28.60 ± 0.19 | 0.1250 ± 0.0298 |
| RIZa  *A.rubrum* (3.95)  *Elaeagnus umbellata* (0.25)  *F.americana* (3.36)  *P.grandidentata* (3.92)  *P.serotina* (8.93)  *T.americana* (0.47) | 15.20 ± 0.04 | 17.5 | 0.0125 ± 0.0001 | 6.75 ± 0.07 | 0.0000 ± 0.0001 |
| RIZb  *A.rubrum* (5.97)  *F.americana* (9.27)  *P.serotina* (5.54)  *Q.velutina* (13.66)  *U.americana* (0.32) | 5.07 ± 0.04 | 25.5 | 0.0250 ± 0.0001 | 10.25 ± 0.28 | 0.1125 ± 0.0068 |
| RODa  *A.saccharum* (7.47)  *O.virginiana* (0.2)  *Q.alba* (8.18)  *T.americana* (6.41) | 14.12 ± 0.04 | 22.2 | 0.0000 ± 0.0001 | 2.00 ± 0.09 | 0.0000 ± 0.0001 |
| RODb  *F.americana* (7.11)  *O.virginiana* (2.34)  *Q.alba* (0.94)  *T.americana* (9.51) | 11.62 ± 0.03 | 12.8 | 0.0000 ± 0.0001 | 9.13 ± 0.12 | 0.0000 ± 0.0001 |
| SCAa  *A.rubrum* (4.66)  *C.glabra* (0.57)  *C.ovata* (0.23)  *F.americana* (3.73)  *P.serotina* (5.95)  *Q.alba* (4.98)  *Q.rubra* (4.09)  *U.americana* (0.58) | 7.45 ± 0.03 | 21.1 | 0.5750 ± 0.0123 | 10.53 ± 0.15 | 0.0250 ± 0.0001 |
| SCAb  *A.rubrum* (9.85)  *C.glabra* (1.94)  *P.serotina* (27.8)  *Q.alba* (2.87)  *Q.muehlenbergii* (1.2)  *Q.rubra* (2.52) | 3.05 ± 0.03 | 46.2 | 0.9500 ± 0.0096 | 21.25 ± 0.20 | 1.5250 ± 0.0206 |
| SCIa  *A.saccharum* (1.55)  *C.cordiformis* (0.28)  *C.ovata* (1.54)  *F.americana* (9.71)  *J.virginiana* (3.13)  *O.virginiana* (1.18)  *P.grandidentata* (2.03)  *Q.rubra* (1.75)  *T.americana* (1.84)  *U.americana* (3.19) | 6.90 ± 0.04 | 16.5 | 0.0500 ± 0.0072 | 23.63 ± 0.19 | 0.0750 ± 0.0001 |
| SCIb  *A.saccharum* (4.72)  *C.cordiformis* (2.68)  *C.ovata* (6.39)  *O.virginiana* (0.42)  *Q.alba* (4.77)  *Q.rubra* (4.17) | 15.97± 0.04 | 23.1 | 0.4625 ± 0.0163 | 6.98 ± 0.12 | 0.0000 ± 0.0001 |
| SL-SLWa  *F.americana* (4.8)  *J.virginiana* (5.82)  *P.deltoides* (5.82)  *Q.muehlenbergii* (1.33)  *Q.rubra* (0.25)  *Q.velutina* (1.17) | 3.00 ± 0.02 | 9 | 0.4625 ± 0.0130 | 53.10 ± 0.34 | 0.5750 ± 0.0196 |
| SL-SLWb  *C.glabra* (0.84)  *F.americana* (5.68)  *J.virginiana* (0.23)  *P.deltoides* (13.79)  *Q.muehlenbergii* (7.73)  *Q.rubra* (15.6)  *U.rubra* (3.36) | 3.55 ± 0.02 | 42.3 | 0.4125 ± 0.0107 | 11.28 ± 0.21 | 0.0250 ± 0.0001 |
| STIa  *A.rubrum* (3.46)  *A.sccharum* (7.53)  *P.serotina* (2.44)  *Q.alba* (7.25)  *Q.rubra* (4.5)  *Q.velutina* (6.13) | 2.72 ± 0.02 | 31.3 | 0.0000 ± 0.0001 | 26.48 ± 0.22 | 0.0000 ± 0.0001 |
| STIb  *A.rubrum* (4.85)  *A.sccharum* (2.56)  *C.glabra* (1.57)  *P.serotina* (2.28)  *Q.alba* (3.36)  *Q.velutina* (18.3) | 2.07 ± 0.03 | 32.9 | 0.0625 ± 0.0001 | 1.55 ± 0.18 | 0.0000 ± 0.0001 |
| WATa  *A.rubrum* (1.79)  *C.glabra* (3.28)  *F.americana* (11.41)  *P.serotina* (9.93)  *Q.bicolor* (0.38)  *Q.shumardii* (9.07)  *Thuja occidentalis* (1.4)  *T.americana* (1.67)  *U.americana* (1.22) | 3.40 ± 0.02 | 27.7 | 0.0875 ± 0.0068 | 19.93 ± 0.26 | 0.6500 ± 0.0138 |
| WATb  *A.rubrum* (5.54)  *C.glabra* (2.67)  *F.americana* (3.23)  *P.grandidentata* (5.91)  *P.serotina* (1.98)  *Q.bicolor* (1.32)  *Q.rubra* (9.39)  *Q.velutina* (8.96)  *S.albidum* (0.5)  *U.americana* (1.43) | 5.40 ± 0.03 | 37.7 | 0.1250 ± 0.0058 | 8.18 ± 0.17 | 0.4375 ± 0.0131 |
| WILa  *A.rubrum* (3.84)  *F.americana* (6.51)  *P.serotina* (2.53)  *Q.rubra* (2.11)  *U.americana* (0.39) | 6.25 ± 0.02 | 9.1 | 0.2375 ± 0.0113 | 20.28 ± 0.16 | 0.5625 ± 0.0148 |
| WILb  *A.saccharum* (17.38)  *F.americana* (1.2)  *P.resinosa* (7.14)  *P.serotina* (30.31) | 45.27 ± 0.01 | 54.8 | 0.0625 ± 0.0144 | 12.13 ± 0.19 | 0.2375 ± 0.0125 |
| WLPLKa  *A.rubrum* (10.77)  *Cornus florida* (0.22)  *Q.rubra* (26.27)  *S.albidum* (37.89) | 4.72 ± 0.06 | 37.8 | 0.0250 ± 0.0001 | 2.15 ± 0.10 | 0.0125 ± 0.0001 |
| WLPLKb  *A.rubrum* (12.21)  *Liriodendron tulipifera* (6.16)  *P.serotina* (7.07)  *Q.rubra* (5.3)  *Q.velutina* (2.36)  *S.albidum* (1.32) | 3.55 ± 0.06 | 34.4 | 0.0250 ± 0.0001 | 11.20 ± 0.31 | 0.3750 ± 0.0149 |

**Supplementary Material 4**: Invasive and weedy species and description used to classify as weedy/invasive species. Plants were characterized as weedy species if they are native, not typically growing in closed canopy forests but rather in more open, higher-light environments. Plants were characterized as invasive if they are not native to North America. Classification as weedy/invasive based on Voss and Reznicek (2012). Numbers indicate the plots where saplings of those species were found (see Supplementary Material 1 for the list of plots), number of stems recorded in the 80 m2 sampled area are included in parenthesis.

| **Scientific Name** | **Weedy** | **Invasive** |
| --- | --- | --- |
| *Acer negundo*  (weedy, common in disturbed places)  1 (1), 2 (2), 16 (1), 28 (1), 28 (1), 38 (2), 39 (10) | * |  |
| *Acer sachharinum*  (in fencerows along roadsides)  22 (1) | * |  |
| *Ailanthus altissima*  (native of China, weed tree) |  | * |
| *Alliaria petiolate*  (native of Europe and Asia, serious pest of forest understories) |  | * |
| *Ampelopsis brevipedunculata*  (Asian vine, potentially invasive) |  | * |
| *Berberis thunbergii*  (native of Asia, may become well established)  12 (49), 13 (41), 15 (12) |  | * |
| *Celastrus orbiculatus*  (native of Asia, locally serious weed of forests)  12 (19), 13 (2), 18 (6) |  | * |
| *Chenopodium album*  (cosmopolitan weed) | * |  |
| *Convolvulus arvensis*  (Eurasian weed) | * |  |
| *Elaeagnus umbellata*  (Asian species, terrible weed)  1 (7), 8 (11), 9 (14), 10 (34), 11(140), 12 (15), 13 (55), 15 (2), 32 (6), 33 (1), 34 (1), 35 (10), 36 (2), 37 (28), 38 (1), 39 (3), 40 (1), 41 (10) |  | * |
| *Euonymus alata*  (eastern Asia, spread occasionally to forests) |  | * |
| *Frangula alnus*  (Eurasian species, major pest)  1 (2), 2 (2), 5 (1), 32 (1) |  | * |
| *Leonurus cardiac*  (native of Europe) |  | * |
| *Ligustrum vulgare*  (native of Europe)  5 (6), 16 (8), 17 (1), 13 (4) |  | * |
| *Lonicera maackii*  (Asian species)  5 (25), 16 (1), 13 (3), 15 (2), 18 (39), 19 (8), 21 (3), 25 (2), 28 (1), 29 (11), 30 (2) |  | * |
| *Lonicera tatarica*  (native of Eurasia)  2 (5), 5 (64), 8 (8), 10 (1), 12 (2), 17 (16), 25 (2), 29 (3), 36 (21), 38 (28) |  | * |
| *Oxalis* spp*.*  (common weedy species, some are introduced species) | * |  |
| *Parthenocissus quinquefolia*  (thickets) | * |  |
| *Phytolacca americana*  (borders of forests, disturbed forests) | * |  |
| *Plantago* spp*.*  (open habitats, some introduced species) |  | * |
| *Polygonum* spp*.*  (common weeds) | * |  |
| *Rhamnus cathartica*  (Eurasina species)  2 (1), 5 (1), 6 (1), 7 (1), 12 (13), 13 (6), 28 (1), 29 (107) |  | * |
| *Rhus glabra*  (open forests)  2 (1), 39 (2) | * |  |
| *Robinia pseudoacacia*  (locally established as a weed tree) | * |  |
| *Rosa multiflora*  (native of Eastern Asia)  8 (1), 11 (5), 12 (4), 13 (27), 14 (24), 17 (1), 22 (1), 23 (14), 25 (4), 36 (32), 41 (20) |  | * |
| *Rosa* spp*.*  (most species associated with open habitats) |  | * |
| *Rubus* spp*.*  (some introduced, grow in open environments)  6 (1), 10 (3), 16 (11), 12 (18), 13 (36), 14 (58) ,15 (14), 18 (15), 21 (5), 30 (3), 32 (39), 36 (5), 40 (7) | * |  |
| *Sambucus* spp*.*  (borders of forests) | * |  |
| *Smilax* spp*.*  (thickets) | * |  |
| *Solanum* spp*.*  (some considered weeds, disturbed areas) | * |  |
| *Solidago* spp*.*  (mostly in open habitats) | * |  |
| *Taraxacum officinale*  (Eurasian species) |  | * |
| *Toxicodendron radicans*  (thickests, open ground) | * |  |
| *Urtica dioica*  (moist disturbed forests and thickets) | * |  |
| *Vicia* spp*.*  (eight out of ten species are European, borders of forests) | * |  |
| *Vinca minor*  (native to Europe) |  | * |
| *Vitis riparia*  (along forest borders, thickets)  18 (1) | * |  |
| *Vitis* spp*.*  (thickets)  18 (1), 33 (1) | * |  |

Voss, E.G.; Reznicek, A.A. *Field Manual of Michigan Flora* **2012** University of Michigan Press, Ann Arbor USA.

**Supplementary Material 5:** Soil moisture (volumetric, %, means±SD), light (photosynthetic active radiation PAR, μmol s-1 m-2,means±SD), and forest cover percentage around the plot (1 km radius) for each study site.

| **Plot name** | **Soil moisture** | **Light** | **Forest Cover** |
| --- | --- | --- | --- |
| BRIa | 8.4 ± 3.3 | 27.4 ± 15 | 79% |
| BRIb | 4.8 ± 1.8 | 7.6 ± 9.3 | 75% |
| CALa | 16.7 ± 5.7 | 41.3 ± 27.5 | 60% |
| CALb | 16.4 ± 3.0 | 86.1 ± 141.8 | 61% |
| CRPK | 31.5 ± 4.9 | 110.5 ± 180.9 | 52% |
| DHMPKa | 23.8 ± 5.1 | 63.3 ± 40.2 | 50% |
| DHMPKb | 20.5 ± 6.6 | 68.6 ± 189.7 | 50% |
| GEOa | 24.6 ± 5.3 | 177.0 ± 162.3 | 79% |
| GEOb | 14.1 ± 3.2 | 90.1 ± 190.5 | 85% |
| GREa | 16.3 ± 4.1 | 165.5 ± 255.7 | 60% |
| GREb | 9.9 ± 2.9 | 20.8 ± 8.0 | 63% |
| HURa | 11.7 ± 3.1 | 163.3 ± 146.4 | 72% |
| HURb | 22.6 ± 4.1 | 64.1 ± 30.1 | 72% |
| KSa | 37.0 ± 6.0 | 547.9 ± 231.5 | 70% |
| KSb | 34.0 ± 5.0 | 131.8 ± 89.8 | 68% |
| LPRFLTa | 32.0 ± 5.9 | 31.6 ± 11.2 | 55% |
| LPRFLTb | 24.1 ± 6.3 | 47.0 ± 31.9 | 52% |
| PNKSLa | 19.7 ± 5.1 | 105.8± 158.3 | 87% |
| PNKSLb | 16.7 ± 5.3 | 109.2 ± 122.6 | 84% |
| RADa | 10.9 ± 3.8 | 70.6 ± 92.4 | 61% |
| RADb | 10.3 ± 3.4 | 12.5 ± 8.3 | 61% |
| REDa | 25.5 ± 4.1 | 80.5 ± 88.6 | 32% |
| REDb | 23.5 ± 5.7 | 7.7 ± 7.1 | 32% |
| RIZa | 11.5 ± 2.9 | 89.3 ± 130.6 | 53% |
| RIZb | 14.6 ± 4.8 | 31.4 ± 23.9 | 54% |
| RODa | 33.7 ± 6.3 | 30.6 ± 17.6 | 33% |
| RODb | 25.3 ± 6.1 | 25.7 ± 17.4 | 32% |
| SCAa | 23.3 ± 6.2 | 28.6 ± 10.1 | 26% |
| SCAb | 34.8 ± 3.4 | 24.1 ± 44.4 | 25% |
| SCIa | 25.0 ± 5.5 | 149.0 ± 250.7 | 45% |
| SCIb | 22.5 ± 4.9 | 18.8 ± 3.9 | 44% |
| SL-SLWa | 9.5 ± 3.6 | 184.2 ± 141.6 | 56% |
| SL-SLWb | 12.5 ± 6.8 | 45.5 ± 23.6 | 51% |
| STIa | 27.7 ± 6.0 | 19.1 ± 10.8 | 90% |
| STIb | 27.9 ± 2.8 | 21.0 ± 10.8 | 93% |
| WATa | 25.4 ± 12.2 | 25.8 ± 34.7 | 78% |
| WATb | 20.0 ± 8.9 | 78.5 ± 83.0 | 77% |
| WILa | 16.7 ± 4.7 | 89.8 ± 42.7 | 36% |
| WILb | 9.7 ± 2.9 | 55.0 ± 80.8 | 34% |
| WLPLKa | 14.8 ± 5.0 | 86.6 ± 298.9 | 80% |
| WLPLKb | 15.8 ± 4.5 | 28.8 ± 17.6 | 77% |

**Supplementary Material 6:** Model Code for OpenBugs 3.2.3.

Simulations were run to 100,000 iterations, the first 50,000 iterations were discharged in the calculations of the parameters. Convergence of the chains was assessed using the Gelman-Rubin statistics [1].

model{

for(i in 1:41){

#estimating precisions from SD

All_slingtau[i]<-pow(All_sling_sd[i],-2)

FRtau[i]<-pow(FR_Sapling_sd[i],-2)

SIWtau[i]<-pow(ScoverIW_sd[i],-2)

#adding variability around the basal area estimates

batau[i]<-pow(ba_sd[i],-2)

baS[i]~dnorm(ba[i],batau[i])

#likelihood for Fraxinus saplings

FR_Sapling[i]~dpois(FRM[i]) #likelihood

FRM[i]<-alpha[1]+alpha[2]*forest[i]+alpha[3]*Tresiduals[i] #process model

#likelihood for IW saplings

IW_saplings[i]~dpois(IW[i]) #likelihood

IW[i]<-beta[1]+beta[2]*FRM[i]+beta[3]*forest[i] #process model

#likelihood for all seedlings

All_slingNoIW[i]~dnorm(AS[i],All_slingtau[i]) #likelihood

AS[i]<-gamma[1]+gamma[2]*baS[i]+gamma[3]*IW[i] #process model

}

#priors

for(i in 1:3){alpha[i]~dnorm(0,0.0001)}

for(i in 1:3){beta[i]~dnorm(0,0.0001)}

for(i in 1:3){gamma[i]~dnorm(0,0.0001)}

}

[1] Brooks, S.P.; Gelman, A. Alternative methods for monitoring convergence of iterative simulations. *Journal of Computational and Graphical Statistics* **1998**, 7, 434-455.

**Supplementary Material 7:** Model comparisons between alternatives models to our final hierarchical model. Because explanatory variables differ among models we used goodness of fit (predicted native seedlings *vs* observed native seedlings) for model comparisons.

| **Model** | **Goodness of Fit** |
| --- | --- |
| Native seedlings ~ *Fraxinus* saplings | 0.0063 |
| Native seedlings ~ Invasive and Weedy saplings | 0.11 |
| Native seedlings ~ Basal area | 0.13 |
| Native seedlings ~ Basal area + Invasive&Weedy | 0.18 |
| Native seedlings ~ Basal area + Invasive&Weedy  Invasive & Weedy seedlings ~ *Fraxinus* saplings | 0.23 |
| Native seedlings ~ Basal area + Invasive&Weedy  Invasive & Weedy seedlings ~ *Fraxinus* saplings + forest cover | 0.53 |
| Native seedlings ~ Basal area + Invasive&Weedy  Invasive & Weedy seedlings ~ *Fraxinus* saplings + forest cover  *Fraxinus* saplings ~ Basal area + Biocontrol | 0.97 |
